# Supplementary material for: In situ fabrication of halide perovskite nanocrystals embedded in polymer composites via microfluidic spinning microreactors
Source: Royal Society of Chemistry journal article supplement (doi:10.1039/c7tc02847d), 2017-01-01
Supplement: c7tc02847d1.pdf [file c7tc02847d1.pdf]

## In-situ Fabrication of Halide Perovskite Nanocrystal-Embedded Polymer Composites via Microfluidic Spinning Microreactors

Kangzhe Ma, Xiang-Yun Du, Ya-Wen Zhang, and Su Chen\*

*State Key Laboratory of Materials-Oriented Chemical Engineering, College of Chemical Engineering, Jiangsu Key Laboratory of Fine Chemicals and Functional Polymer Materials, Nanjing Tech University (former Nanjing University of Technology), Nanjing 210009, China. \*Email: chensu@njtech.edu.cn; Fax: +86-25-83172258; Tel: +86-25-83172258.*

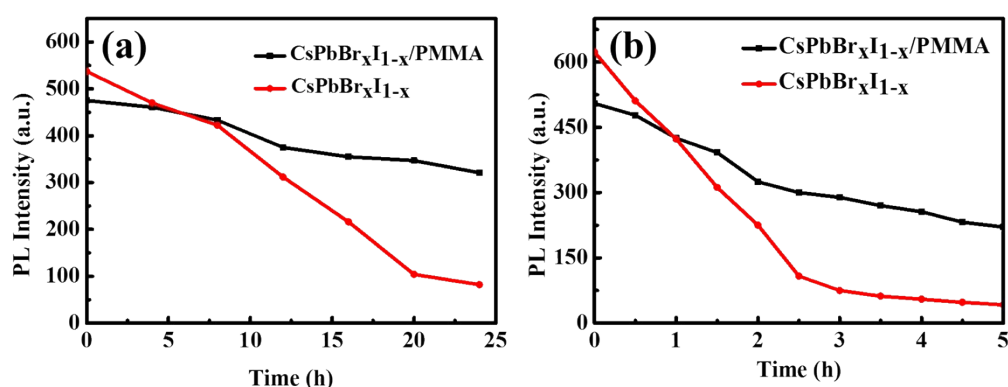

Figure S1. Humidity, thermal and UV-light stability characterizations: Change of fluorescence peak intensity (CsPbBr<sub>x</sub>I<sub>1-x</sub>/PMMA and CsPbBr<sub>x</sub>I<sub>1-x</sub>) with time under different environment of (a) humidity (70%), temperature (30 °C), and (b) UV-light.

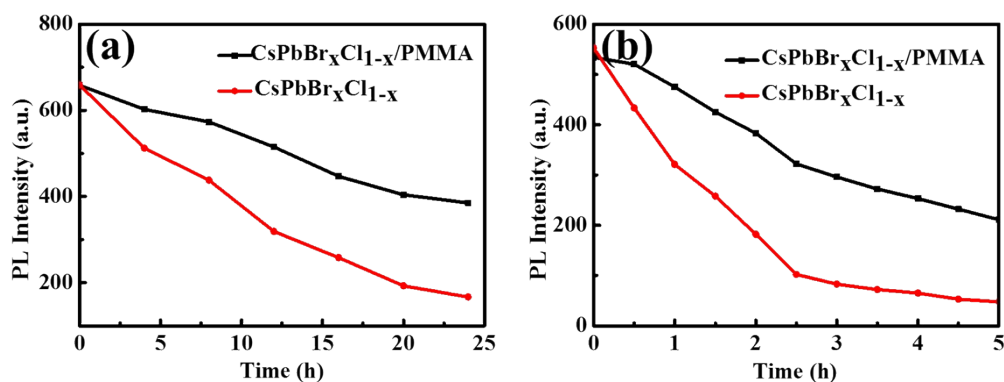

Figure S2. Humidity, thermal and UV-light stability characterizations: Change of fluorescence peak intensity (CsPbBr<sub>x</sub>Cl<sub>1-x</sub>/PMMA and CsPbBr<sub>x</sub>Cl<sub>1-x</sub>) with time under different environment of (a) humidity (70%), temperature (30 °C), and (b) UV-light.

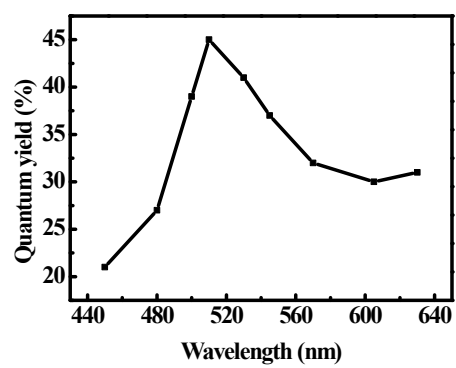

Figure S3. Quantum yields of the as-prepared microfibers with different fluorescence wavelength.
